# Supplementary material for: Cell traction force in a confined microenvironment with double-sided micropost arrays
Source: PubMed Central journal article supplement (PMC9061871; doi:10.1039/c8ra10170a), 2019-03-14
Supplement: RA-009-C8RA10170A-s001.pdf [file RA-009-C8RA10170A-s001.pdf]

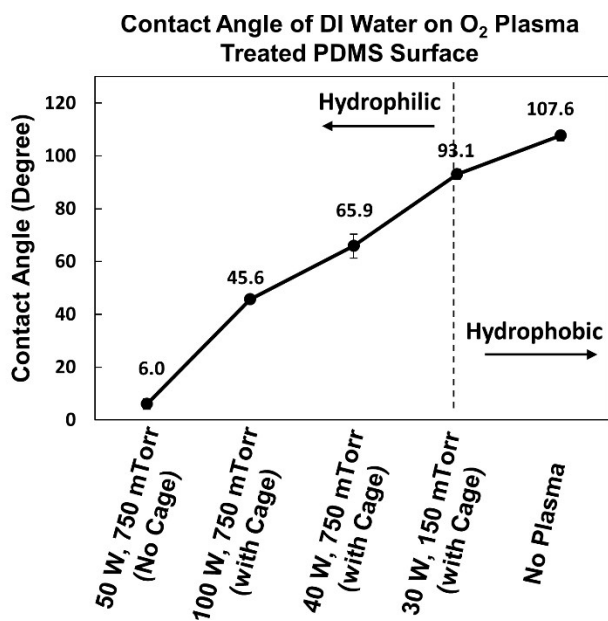

Figure S1

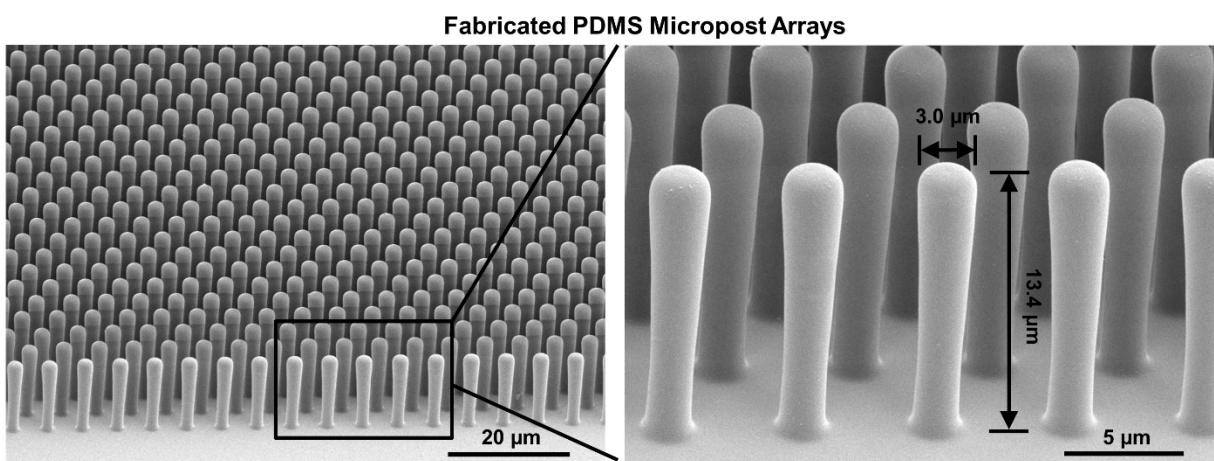

Figure S2

MC3T3-E1 Cell in Double Micropost Platform with 10  $\mu\text{m}$  Separation,  
 Top Post Arrays with 3  $\mu\text{m}$  in Dia. and 5  $\mu\text{m}$  in Spacing  
 Bottom Post Arrays with 3  $\mu\text{m}$  in Dia. and 3  $\mu\text{m}$  in Spacing

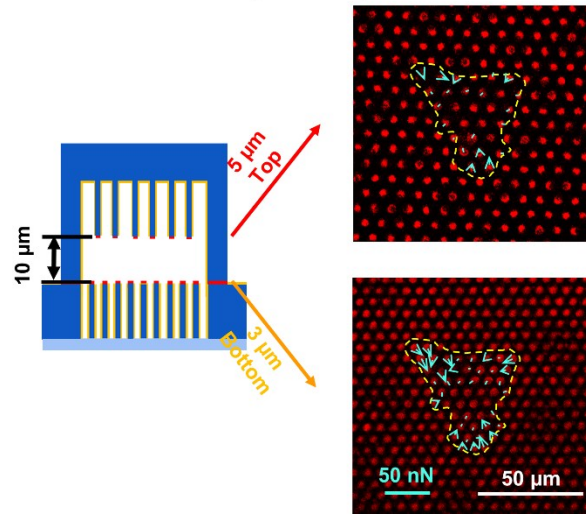

Figure S3

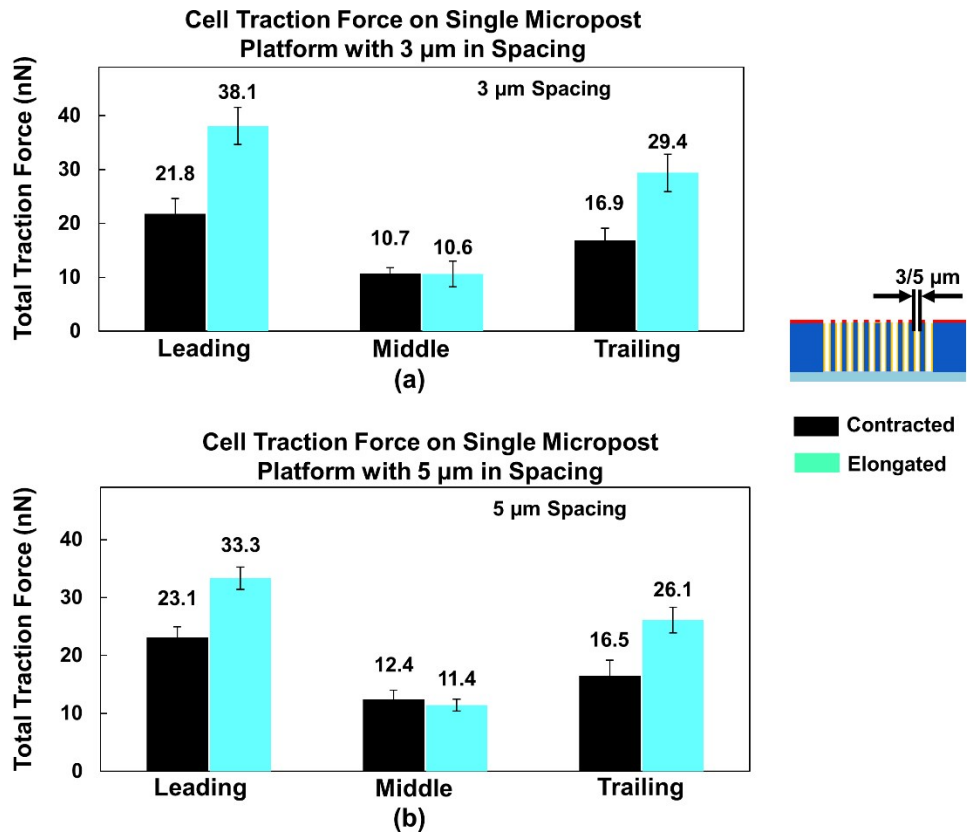

Figure S4
